# Supplementary material for: Nickel–copper supported on a carbon black hydrogen oxidation catalyst integrated into an anion-exchange membrane fuel cell
Source: Royal Society of Chemistry journal article supplement (doi:10.1039/c8se00261d), 2018-01-01
Supplement: c8se00261d1.pdf [file c8se00261d1.pdf]

## Supplementary Material

### Nickel-Copper Supported on Carbon Black Hydrogen Oxidation Catalyst Integrated in Anion-Exchange Membrane Fuel Cell

Aaron Roy<sup>a</sup>, Morteza R. Talarposhti<sup>a</sup>, Stanley Normile<sup>b</sup>, Iryna V. Zenyuk<sup>b</sup>, Vincent De Andrade<sup>c</sup>,  
Kateryna Artyushkova<sup>a</sup>, Alexey Serov<sup>a</sup>, and Plamen Atanassov<sup>a</sup>

<sup>a</sup>Department of Chemical & Biological Engineering, Center for Micro-Engineered Materials, University of New Mexico, Albuquerque, NM 87131, USA

<sup>b</sup>Department of Mechanical Engineering, Tufts University, 200 College Avenue, Medford, MA 02155, USA

#### Section 1: Supplementary information related to the calculation of exchange current density.

The exchange current density ( $j_0$ ), the reaction rate of the forward and reverse reactions at chemical equilibrium, is an important kinetic parameter which describes how the rate of an electrochemical reaction increases as a function of applied overpotential ( $\eta$ ). The exchange current density is related to overpotential as described by the Tafel equation:

$$\ln\left(\frac{j}{j_0}\right) = \frac{\alpha n F}{RT} \eta \quad \text{Equation S1}$$

Where  $j$  is the measured current density,  $\alpha$  is the transfer coefficient,  $F$  is the Faraday constant,  $n$  is the number of electrons transferred,  $T$  is the absolute temperature in K, and  $R$  is the universal gas constant. Rearranging Equation S1 gives:

$$j = j_0 \frac{\alpha n F}{RT} \eta \quad \text{Equation S2}$$

To approximate  $j(\eta)$  at values within the micropolarization region, where  $\eta \approx 0$ , a Taylor series expansion around  $\eta = 0$  can be used to derive an expression for the linear dependence on  $\eta$  of  $j$ :

$$\sum_{n=0}^1 \frac{j'(0)}{n!} (\eta - 0)^n \quad \text{Equation S3}$$

Differentiation of  $j(\eta)$  and evaluation at  $\eta = 0$  gives the linear dependence of  $\eta$  in the micropolarization region:

$$j = j_0 + j_0 \frac{\alpha n F}{RT} \eta \quad \text{Equation S4}$$

which is of the form  $y = b + mx$ . By definition,  $j_0$  is not directly measured since the net Faradic current where  $\eta = 0$  is also zero. However, the second term of the Taylor series expansion gives the linear relationship between  $j$  and  $\eta$  in the micropolarization region. Additionally,  $\alpha$  is a measure of the fraction of the interfacial potential used to overcome the Gibbs free energy barrier of the reaction, and in the micropolarization region where  $\eta \approx 0$ ,  $\alpha \approx 1$ . Therefore, a plot of  $j$  vs  $\eta$  in the micropolarization region can be fit to a linear expression and the slope can be used to calculate  $j_0$ :

$$j = j_0 \frac{n F}{RT} \eta = m \eta \quad \text{Equation S5}$$

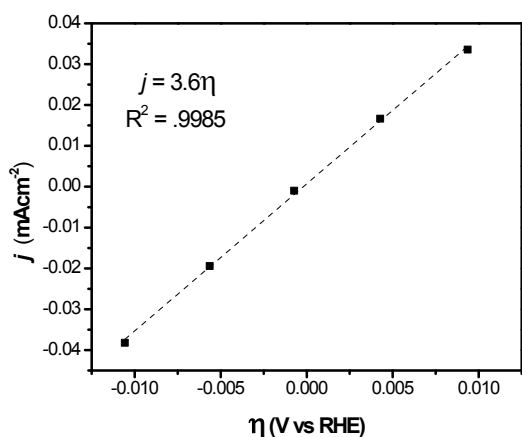

**Figure S1.** Plot of measured current density normalized to the geometric surface area of the working electrode versus overpotential in the microkinetic region ( $\approx -10$  mV – 10 mV vs. RHE). Data was acquired using a scan rate of 5 mVs<sup>-1</sup> with a rotation speed of 1600 RPM in hydrogen

saturated 0.1 M KOH with a total catalyst loading of 100  $\mu\text{g}$ .

## Section 2: Supplementary information related to the effect of catalyst loading.

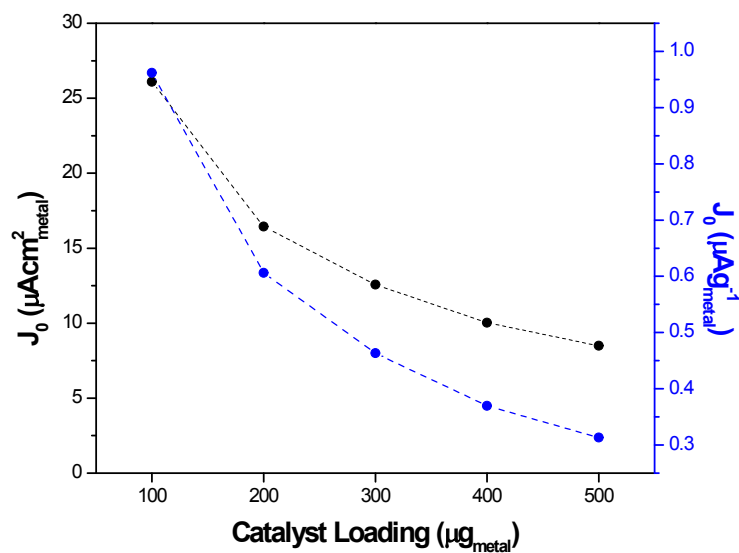

**Figure S2.** Specific activity and mass-weighted activity calculated from exchange current density for HOR on  $\text{Ni}_{95}\text{Cu}_5$  catalysts as a function of catalyst loading on the working electrode. Exchange current densities were calculated from data obtained at a rotation rate of 1600 RPM.

## Section 3: Supplementary information related to the crystal structure of $\beta\text{-NiOOH}$ and $\beta\text{-Ni(OH)}_2$ .

Based on first principles simulations, the structure of  $\beta\text{-NiOOH}$  is considered to be similar to that of  $\beta\text{-Ni(OH)}_2$ , Trigonal in the  $P3m1$  space group. One key difference between the two phases are in the degree at which the (001) surface is terminated with hydrogen, which ranges from 100 % in  $\beta\text{-Ni(OH)}_2$  to as low as 25 % in  $\beta\text{-NiOOH}$  as calculated in literature<sup>1,2</sup>. Figure S2 shows the case of 100 % termination in  $\beta\text{-Ni(OH)}_2$  and 50 % termination in  $\beta\text{-NiOOH}$  of the (001) plane.

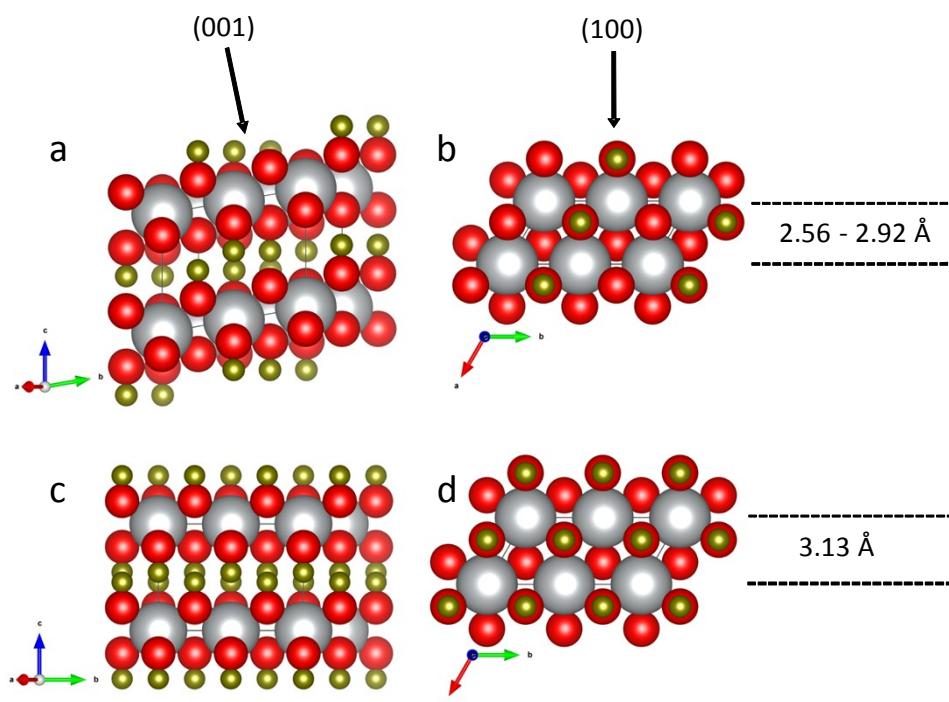

**Figure S3.** Unit cell representations for a)  $\beta$ -NiOOH projected perpendicular to the (001) direction, b)  $\beta$ -NiOOH projected along the (001) direction, c)  $\beta$ -Ni(OH)<sub>2</sub> projected perpendicular to the (001) direction, and d)  $\beta$ -Ni(OH)<sub>2</sub> projected along the (001) direction. Crystal structure visualizations were created using VESTA<sup>3</sup>.

The result of hydrogen vacancies in the (001) plane of  $\beta$ -NiOOH is hydrophilicity due to the formation of hydrogen bonds from water with the hydrogen deficient surface of  $\beta$ -NiOOH. Similarly, the fully saturated (001) surface of  $\beta$ -Ni(OH)<sub>2</sub> leads to hydrophobicity<sup>1</sup>. In the present work, the observed hydrophobic nature of the Ni<sub>95</sub>Cu<sub>5</sub> electrode suggests similar hydrophobicity to that which is exhibited by  $\beta$ -Ni(OH)<sub>2</sub>. Therefore, it is likely that the hydroxylated surface of the Ni<sub>x</sub>Cu<sub>1-x</sub> electrode is isostructural with  $\beta$ -Ni(OH)<sub>2</sub>. The isostructural nature of Ni<sub>x</sub>Cu<sub>1-x</sub> with  $\beta$ -Ni(OH)<sub>2</sub> can be rationalized by the lattice expansion along the (100) direction in  $\beta$ -Ni(OH)<sub>2</sub> compared to  $\beta$ -NiOOH (as shown in Figure S2). Cu, with a covalent radius approximately 5-8% larger than that of Ni, when alloyed with Ni will elicit a similar lattice expansion along the (100) direction.

#### References:

1. M. J. Eslamibidgoli, Gro and M. Eikerling, *Phys. Chem. Chem. Phys.*, 2017, **19**, 22659-22669.
2. A. J. Tkalych, K. Yu and E. A. Carter, *The Journal of Physical Chemistry C*, 2015, **119**, 24315–24322.
3. K. Momma and F. Izumi, *Journal of Applied Crystallography*, 2011, **44**, 1272–1276.
